# Supplementary material for: A novel, low surface charge density, anionically modified montmorillonite for polymer nanocomposites
Source: Royal Society of Chemistry journal article supplement (doi:10.1039/c6ra27562a), 2017-01-01
Supplement: c6ra27562a1.pdf [file c6ra27562a1.pdf]

## Supplementary Information

### **A novel, low surface charge density, anionically modified montmorillonite for polymer nanocomposites**

**Deqi Yi,<sup>1\*</sup> Huixin Yang,<sup>1</sup> Min Zhao,<sup>1</sup> Le Huang,<sup>1</sup> Giovanni Camino,<sup>2</sup> Alberto Frache,<sup>2</sup> Rongjie Yang<sup>1</sup>**

<sup>1</sup>National Engineering Research Center of Flame retardant Materials, School of Materials Science and Engineering, Beijing Institute of Technology, No. 5 South Zhongguancun Street, Haidian District, Beijing, 10081, China

<sup>2</sup>Polytechnic of Turin, Alessandria Campus, UdR INSTM of Turin, V.le Teresa Michel 5, 15121 Alessandria, Italy.

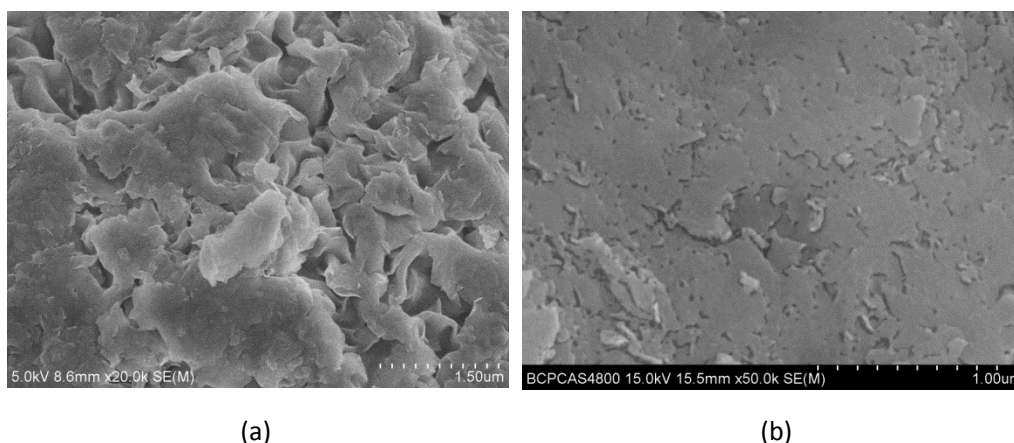

Fig. S1. SEM images of NaMMT (a) and t-MMT (b)

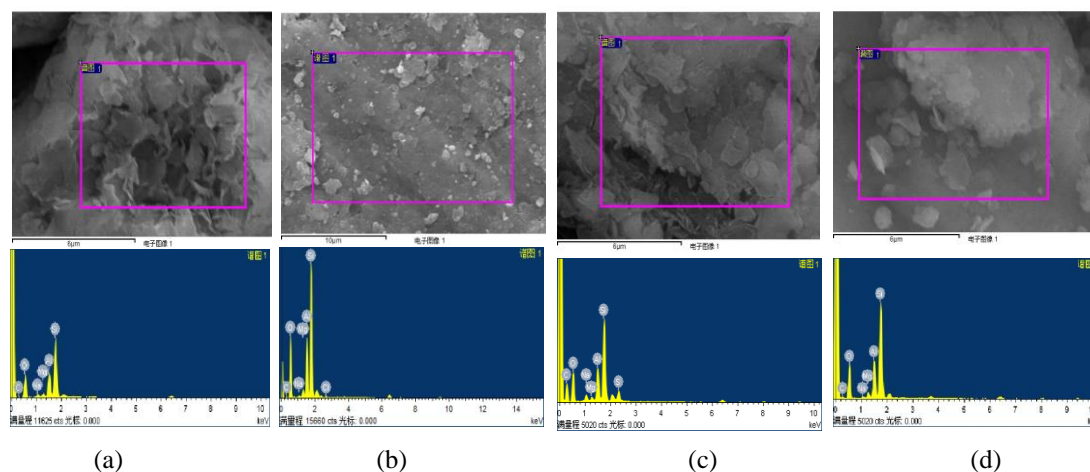

Fig. S2. EDS analysis of NaMMT (a), t-MMT (b), SST-t-MMT (c) and SDS-t-MMT (d)

\* Correspondence to: Deqi Yi ([yidq@bit.edu.cn](mailto:yidq@bit.edu.cn))

Table S1. Elemental composition of NaMMT, t-MMT, SSS-t-MMT and SDS-t-MMT from EDS analysis

| Elements | NaMMT  | t-MMT  | SDS-MMT | SST-MMT |
|----------|--------|--------|---------|---------|
| C        | 5.32   | 8.83   | 50.12   | 14.52   |
| O        | 59.95  | 56.20  | 36.04   | 55.44   |
| Na       | 1.93   | 0.14   | 1.10    | 0.47    |
| Mg       | 1.28   | 1.30   | 0.50    | 1.36    |
| Al       | 8.54   | 9.15   | 3.18    | 7.50    |
| Si       | 22.97  | 24.38  | 7.97    | 20.71   |
| S        | —      | —      | 1.09    | —       |
| Total    | 100.00 | 100.00 | 100.00  | 100.00  |
